# Supplementary material
Source: PubMed Central journal article supplement (PMC6443471)
Supplement: NIHMS1511313-supplement-1.pdf [file NIHMS1511313-supplement-1.pdf]

Supplemental Table.

Raw Scores for Supplemental Neuropsychological Tests by group.

|                                      | COGNITIVE REMEDIATION<br>THERAPY+SOCIAL SKILLS<br>TRAINING Plus Guanfacine |       |           |       | COGNITIVE REMEDIATION<br>THERAPY+SOCIAL SKILLS<br>TRAINING Plus Placebo |       |           |       | ANOVA Results |          |                      |          |
|--------------------------------------|----------------------------------------------------------------------------|-------|-----------|-------|-------------------------------------------------------------------------|-------|-----------|-------|---------------|----------|----------------------|----------|
|                                      | Baseline                                                                   |       | Post-Test |       | Baseline                                                                |       | Post-Test |       | Time          |          | Time x<br>Medication |          |
|                                      | Mean                                                                       | SD    | Mean      | SD    | Mean                                                                    | SD    | Mean      | SD    | <i>F</i>      | <i>p</i> | <i>F</i>             | <i>P</i> |
| <i>Supplemental Assessments</i>      |                                                                            |       |           |       |                                                                         |       |           |       |               |          |                      |          |
| <i>PASAT</i>                         | 33.93                                                                      | 13.19 | 37.29     | 12.48 | 30.46                                                                   | 13.48 | 32.00     | 14.08 | 2.82,         | 0.11     | 0.39                 | 0.54     |
| <i>DOT Test<sup>a</sup></i>          | 1.51                                                                       | 0.88  | 1.37      | 1.11  | 1.63                                                                    | 1.43  | 1.13      | 1.23  | 1.32          | 0.26     | 0.43                 | 0.26     |
| <i>AX-CPT d'-context<sup>b</sup></i> | 1.69                                                                       | 1.56  | 1.06      | 1.44  | -0.08                                                                   | 0.65  | -0.05     | 0.76  | 0.93          | 0.35     | 1.10                 | 0.31     |
| <i>N-Back: 2-Back<sup>b</sup></i>    | 0.79                                                                       | 0.13  | 0.76      | 0.09  | 0.64                                                                    | 0.14  | 0.64      | 0.10  | 0.28          | 0.60     | 0.38                 | 0.55     |

Notes:

*a*: Higher scores reflect more errors

*b*: Due to a computer failure, data was only available for 14 participants
